# Supplementary material
Source: PubMed Central journal article supplement (PMC5454092)
Supplement: 10.1074_M116.771832_jbc.M116.771832-1.pdf [file 10.1074_M116.771832_jbc.M116.771832-1.pdf]

SUPPLEMENTAL MATERIALS

Figure S1

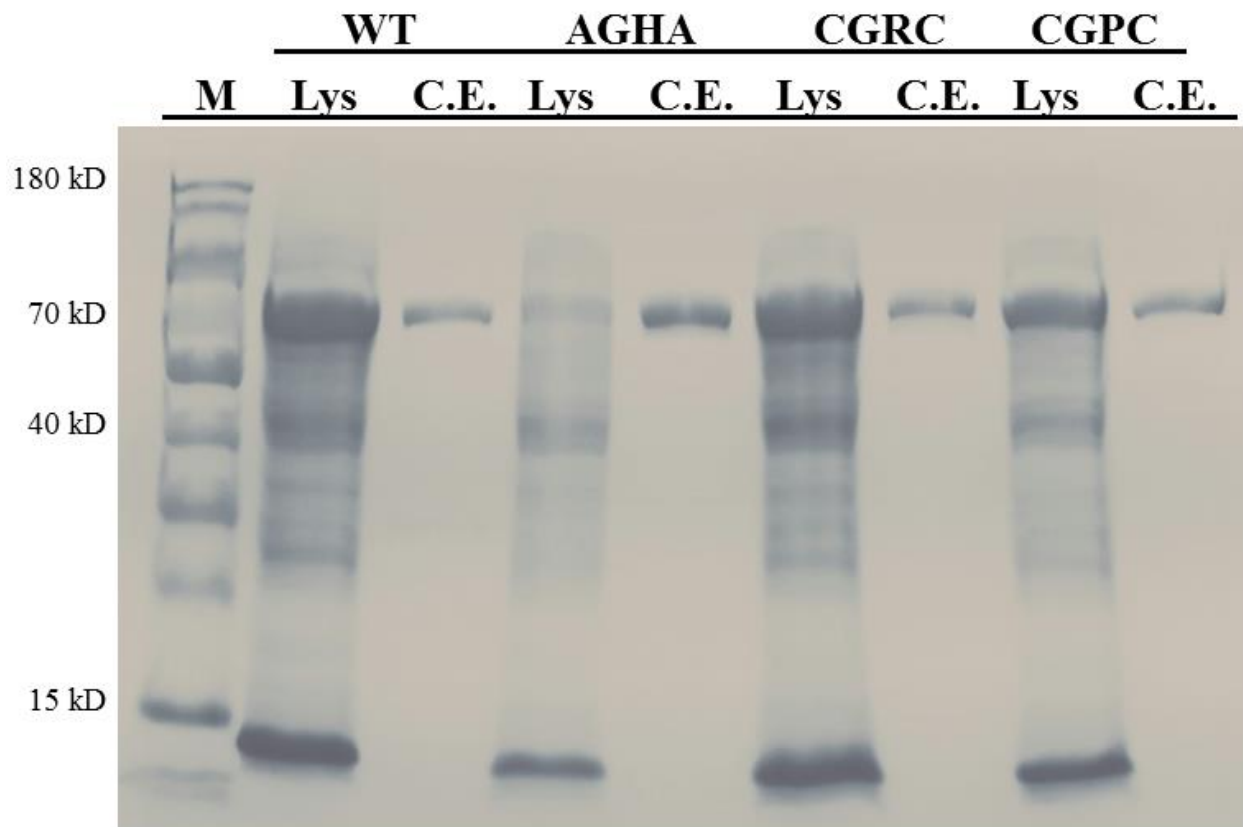

Figure S1. **Purification of PDI Variants** Clarified lysates (Lys) and concentrated eluates (C.E.) of four PDI variants (WT, AGHA, CGRC, CGPC) were generated during purification. 0.01% of the total volume of each fraction was diluted to 20  $\mu$ L with 1X HBS and separated via SDS-PAGE electrophoresis under reducing conditions.
